# Supplementary material
Source: publisher figshare collection journal article supplement (https://acs.figshare.com/ndownloader/files/3906316)
Supplement: Supplementary file 1 [file 3906316]

Cytotoxic Effect of Ergot Alkaloids in *Achnatherum inebrians*

Infected by the *Neotyphodium gansuense* Endophyte

Xingxu Zhang<sup>†</sup>, Zhibiao Nan<sup>†\*</sup>, Chunjie Li<sup>‡</sup>, Kun Gao<sup>‡</sup>

<sup>†</sup> State Key Laboratory of Grassland Agro-Ecosystems; College of  
Pastoral Agricultural Science and Technology, Lanzhou University; P. O.  
Box 61, Lanzhou 730020, P. R. China.

<sup>‡</sup> State Key Laboratory of Applied Organic Chemistry; College of  
Chemistry and Chemical Engineering, Lanzhou University; P. O. Box  
111, Lanzhou 730020, P. R. China.

\*Corresponding author (Tel: +86 931 8661047; Fax: +86 931 8910979;

E-mail: [zhibiao@lzu.edu.cn](mailto:zhibiao@lzu.edu.cn))

## Supporting Information

Table 1: Data for  $^1\text{H}$  NMR spectroscopy of ergonovine and ergonovinine

| Number | Ergonovinine              | Ergonovine                   |
|--------|---------------------------|------------------------------|
| 2      | 6.94 s                    | 6.98 s                       |
| 3      | 3.59 dd (18.8, 7.2)       | 3.4 Overlapped with H-5,6,16 |
| 5      | 2.73 Overlapped with H-16 | 2.60 Overlapped with H-16    |
| 6      | 3.06 m                    | 3.4 Overlapped with H-3,5,16 |
| 7      | 6.48 d (7.6)              | 6.41 s                       |
| 10     | 7.08 Overlapped with H-12 | 7.04 Overlapped with H-12    |
| 11     | 7.18 dd (9, 4.8)          | 7.16 dd (8.4, 6.8)           |
| 12     | 7.08 Overlapped with H-10 | 7.04 Overlapped with H-10    |
| 16     | 3.38 Overlapped with H-5  | 2.60 Overlapped with H-5     |
| 17     | 2.54 s                    | 2.49 s                       |
| 20     | 3.89 m                    | 3.95 m                       |
| 21     | 1.177 d (8.4)             | 1.12 d (9.6)                 |
| 22     | 3.197 d (5.6)             | 3.09 dd (7.2, 6.4)           |

Table 2: Data for  $^{13}\text{C}$  NMR spectroscopy of ergonovine and ergonovinine

| Number | Ergonovinine | Ergonovine |
|--------|--------------|------------|
| 2      | 119.0        | 119.2      |
| 3      | 64.6         | 63.8       |
| 5      | 55.8         | 56.1       |
| 6      | 43.7         | 45.0       |
| 7      | 120.4        | 120.4      |
| 8      | 139.3        | 137.4      |
| 9      | 129.1        | 129.3      |
| 10     | 112.7        | 112.7      |
| 11     | 123.8        | 123.8      |
| 12     | 111.2        | 111.1      |
| 13     | 135.8        | 135.7      |
| 14     | 127.8        | 127.8      |
| 15     | 110.8        | 110.8      |
| 16     | 28.6         | 28.7       |
| 17     | 44.6         | 43.9       |
| 18     | 176.6        | 172.9      |
| 20     | 48.6         | 48.7       |
| 21     | 17.6         | 17.5       |
| 22     | 66.0         | 67.7       |
